# Supplementary material for: (±)-Hypandrone A, a pair of polycyclic polyprenylated acylphloroglucinol enantiomers with a caged 7/6/5/6/6 pentacyclic skeleton from Hypericum androsaemum
Source: Royal Society of Chemistry journal article supplement (doi:10.1039/d4qo00444b), 2024-01-01

## Supporting Information

### **(±)-Hypandrone A, a Pair of Polycyclic Polyprenylated Acylphloroglucinol Enantiomers with a Caged 7/6/5/6/6 Pentacyclic Skeleton from *Hypericum androsaemum***

Jiangchun Wei,<sup>‡a,b,c</sup> Pingping Fan,<sup>‡a</sup> Yahui Huang,<sup>‡a</sup> Hanxiao Zeng,<sup>a</sup> Rui Jiang,<sup>a</sup>  
Zhengzhi Wu,<sup>\*b,c</sup> Yonghui Zhang<sup>\*a</sup> and Zhengxi Hu<sup>\*a,d</sup>

<sup>a</sup>Hubei Key Laboratory of Natural Medicinal Chemistry and Resource Evaluation, School of Pharmacy, Tongji Medical College, Huazhong University of Science and Technology, Wuhan 430030, People's Republic of China

<sup>b</sup>The First Affiliated Hospital of Shenzhen University, Shenzhen Second People's Hospital, Shenzhen 518035, People's Republic of China

<sup>c</sup>Wu Zhengzhi Academician Workstation, Ningbo College of Health Sciences, Ningbo 315800, People's Republic of China

<sup>d</sup>Hubei Shizhen Laboratory, Wuhan 430061, People's Republic of China

\*Corresponding author Tel.: (86) 27-83692892

E-mail: hzx616@126.com (Z.H.), zhangyh@mails.tjmu.edu.cn (Y.Z.), and szwzz001@163.com (Z.W.).

## Contents

|                                                                                                                                          |    |
|------------------------------------------------------------------------------------------------------------------------------------------|----|
| <b>Experimental section</b> .....                                                                                                        | 3  |
| General experimental procedures .....                                                                                                    | 3  |
| Plant material .....                                                                                                                     | 3  |
| Exaction and isolation .....                                                                                                             | 3  |
| Single-crystal X-ray diffraction analysis .....                                                                                          | 3  |
| ECD calculation details .....                                                                                                            | 3  |
| Anti-Inflammatory Effect Assay .....                                                                                                     | 21 |
| <b>Figure S1.</b> The raw images for all Western blot .....                                                                              | 21 |
| <b>Figure S2.</b> <sup>1</sup> H NMR spectrum of compound <b>1</b> (recorded in methanol- <i>d</i> <sub>4</sub> ) .....                  | 22 |
| <b>Figure S3.</b> <sup>13</sup> C NMR spectrum of compound <b>1</b> (recorded in methanol- <i>d</i> <sub>4</sub> ) .....                 | 22 |
| <b>Figure S4.</b> DEPT spectrum of compound <b>1</b> (recorded in methanol- <i>d</i> <sub>4</sub> ) .....                                | 23 |
| <b>Figure S5.</b> HSQC spectrum of compound <b>1</b> (recorded in methanol- <i>d</i> <sub>4</sub> ) .....                                | 23 |
| <b>Figure S6.</b> HMBC spectrum of compound <b>1</b> (recorded in methanol- <i>d</i> <sub>4</sub> ) .....                                | 24 |
| <b>Figure S7.</b> <sup>1</sup> H- <sup>1</sup> H COSY spectrum of compound <b>1</b> (recorded in methanol- <i>d</i> <sub>4</sub> ) ..... | 24 |
| <b>Figure S8.</b> NOESY spectrum of compound <b>1</b> (recorded in methanol- <i>d</i> <sub>4</sub> ) .....                               | 25 |
| <b>Figure S9.</b> HRESIMS spectrum of compound (±)- <b>1</b> .....                                                                       | 25 |
| <b>Figure S10.</b> IR spectrum of compound (±)- <b>1</b> .....                                                                           | 26 |
| <b>Figure S11.</b> UV spectrum of compound (±)- <b>1</b> .....                                                                           | 26 |
| <b>Figure S12.</b> Chiral HPLC separation chromatogram of (±)- <b>1</b> .....                                                            | 27 |
| <b>Figure S13.</b> CD spectrum of (±)- <b>1</b> in MeOH .....                                                                            | 27 |
| <b>Figure S14.</b> CD spectrum of (+)- <b>1</b> in MeOH .....                                                                            | 28 |
| <b>Figure S15.</b> CD spectrum of (-)- <b>1</b> in MeOH .....                                                                            | 28 |

# Experimental section

## General experimental procedures

Optical rotations and UV spectra were recorded on a PerkinElmer 341 polarimeter (PerkinElmer Inc., Fremont, California, USA) and a Lambda 35 instrument (PerkinElmer Inc., Fremont, California, USA), respectively. IR spectra were obtained using a Bruker Vertex 70 FT-IR spectrophotometer (Bruker, Karlsruhe, Germany). Experimental ECD data were collected on a JASCO J-810 spectrometer (JASCO, Tokyo, Japan). The NMR spectra were recorded on a Bruker AM-400 spectrometer with TMS as the internal standard. All chemical shifts ( $\delta$ ) were expressed in ppm relative to the solvent signal (methanol- $d_4$ :  $\delta_H$  3.31,  $\delta_C$  49.0). HRESIMS data were recorded in the positive-ion mode on a Bruker micrOTOF-Q II spectrometer (Bruker, Karlsruhe, Germany). Column chromatography (CC) was performed with silica gel (200–300 mesh, Qingdao Marine Chemical, Inc., Qingdao, China), Sephadex LH-20 (40–70  $\mu\text{m}$ , Amersham Pharmacia Biotech AB, Uppsala, Sweden), and octadecylsilyl (ODS, 50  $\mu\text{m}$ , YMC Co. Ltd., Japan). Semi-preparative HPLC separations were conducted on an Agilent 1100 liquid chromatograph with a reversed-phase (RP)  $C_{18}$  column (5  $\mu\text{m}$ , 10  $\times$  250 mm, Welch Materials, Inc.) and a CHIRALPAK IG preparative column (10  $\times$  250 mm, 5  $\mu\text{m}$  particles, Daicel, China). Thin-layer chromatography (TLC) was carried out with silica gel 60  $F_{254}$  (Yantai Chemical Industry Research Institute). Fractions were monitored by TLC, and spots were visualized by heating silica gel plates sprayed with 10%  $\text{H}_2\text{SO}_4$  in EtOH.

## Plant material

The fruit parts of *Hypericum androsaemum* were collected from Shennongjia Forestry, Hubei Province, People's Republic of China, in October 2022. The plant was identified by Professor Jingming Jia of Shenyang Pharmaceutical University. A voucher specimen (No. HB20221011) has been deposited in the herbarium of School of Pharmacy, Tongji Medical College, Huazhong University of Science and Technology.

## Exaction and isolation

The air-dried fruit parts of *H. androsaemum* (10 kg) were percolated with 95% EtOH three times at room temperature. The combined EtOH extract was concentrated under vacuum (water-bath temperature for evaporation was maintained below 50  $^\circ\text{C}$ ) to yield a residue (860 g). Then, the resulting residue was suspended in  $\text{H}_2\text{O}$  and extracted three times with petroleum ether to afford a crude extract.

The petroleum ether extract (170 g) was subjected to silica gel column chromatography, eluted with petroleum ether/acetate extract (50:1–1:1, v/v) to afford eight main fractions (A–H). Fr. E (12 g) was chromatographed on an MCI gel column (6  $\times$  80 cm) and eluted with  $\text{CH}_3\text{OH}/\text{H}_2\text{O}$  (10:90–100:0, v/v) to get six subfractions (Fr. E1–Fr. E6). Fraction E5 (3.2 g) was further purified on Sephadex LH-20 eluted with  $\text{CH}_3\text{OH}$  to give nine subfractions (Fr. E5-1–Fr. E5-9). Fr. E5-4 (1.4 g) was separated by MPLC over octadecylsilane (ODS) and eluted with a step gradient of  $\text{CH}_3\text{OH}/\text{H}_2\text{O}$  (60:40–90:10, v/v, flow rate: 25 mL/min) to give seven subfractions (Fr. E5-4A–Fr. E5-4G) and Fr. E5-4E (18 mg) purified by preparative HPLC ( $\text{CH}_3\text{CN}/\text{H}_2\text{O}$ , 60/40, v/v, flow rate: 8 mL/min) to yield **1** (5-4E1A, 5.8 mg,  $t_R$  33.6 min). Then, **1** was further separated using a CHIRALPAK IG preparative column (2.0 mL/min;  $\text{CH}_3\text{CN}/\text{H}_2\text{O}$  = 55:45, v/v) to obtain (+)-**1** (2.9 mg,  $t_R$  = 20.1 min) and (–)-**1** (2.3 mg,  $t_R$  = 22.5 min).

Hypandrone A (**1**): colorless crystals, m.p. 236–238  $^\circ\text{C}$ ; UV (MeOH)  $\lambda_{\text{max}}$  ( $\log \epsilon$ ): 201 (3.74), 229 (3.26), 275 (2.78) nm; IR (KBr)  $\nu_{\text{max}}$ : 3436, 2924, 2854, 1732, 1711, 1667, 1645, 1465, 1377, 1237, 1206, 1163, 1080  $\text{cm}^{-1}$ ; for  $^1\text{H}$  and  $^{13}\text{C}$  NMR data, see Table 1; HRMS (ESI-TOF)  $m/z$  529.1840 ( $[\text{M} + \text{Na}]^+$ , calcd 529.1838); (+)-**1**: white powder,  $[\alpha]_D^{25}$ : +33.8 (MeOH,  $c$  0.1); ECD (MeOH)  $\lambda_{\text{max}}$  ( $\Delta\epsilon$ ): 210 (+4.68), 235 (–9.77), 295 (+3.94); (–)-**1**: white powder,  $[\alpha]_D^{25}$ : –33.8 (MeOH,  $c$  0.1); ECD (MeOH)  $\lambda_{\text{max}}$  ( $\Delta\epsilon$ ): 210 (–4.27), 235 (+8.14), 296 (–4.09).

## Single-crystal X-ray diffraction analysis

Crystal data for hypandrone A (**1**) (CCDC No. 2310824):  $M = 506.53$ ,  $a = 13.5043(4)$   $\text{\AA}$ ,  $b = 14.0510(4)$   $\text{\AA}$ ,  $c = 26.6409(8)$   $\text{\AA}$ ,  $\alpha = 90^\circ$ ,  $\beta = 90^\circ$ ,  $\gamma = 90^\circ$ ,  $V = 5055.1(3)$   $\text{\AA}^3$ ,  $T = 150(2)$  K, space group  $Pbca$ ,  $Z = 8$ ,  $\mu(\text{Cu K}\alpha) = 0.801$   $\text{mm}^{-1}$ , 27819 reflections measured, 4615 independent reflections ( $R_{\text{int}} = 0.0794$ ). The final  $R_1$  values were 0.0486 ( $I > 2\sigma(I)$ ). The final  $wR(F^2)$  values were 0.1185 ( $I > 2\sigma(I)$ ). The final  $R_2$  values were 0.0601 (all data). The final  $wR(F^2)$  values were 0.1249 (all data). The goodness of fit on  $F^2$  was 1.095.

## ECD calculation details

## (1) Methods

In general, conformational analyses were carried out via random searching in the Sybyl-X 2.0 using the MMFF94S force field with an energy cutoff of 5 kcal/mol.<sup>[1]</sup> The results showed eight lowest energy conformers. Subsequently, geometry optimizations and frequency analyses were implemented at the B3LYP-D3(BJ)/6-31G\* level in CPCM methanol using ORCA5.0.1<sup>[2]</sup> All conformers used for property calculations in this work were characterized to be stable point on potential energy surface (PES) with no imaginary frequencies. The excitation energies, oscillator strengths, and rotational strengths (velocity) of the first 60 excited states were calculated using the TD-DFT methodology at the PBE0/def2-TZVP level in CPCM methanol using ORCA5.0.1.<sup>[2]</sup> The ECD spectra were simulated by the overlapping Gaussian function (half the bandwidth at 1/e peak height, sigma = 0.30 for all).<sup>[3]</sup> Gibbs free energies for conformers were determined by using thermal correction at B3LYP-D3(BJ)/6-31G\* level and electronic energies evaluated at the wb97M-V/def2-TZVP level in CPCM methanol using ORCA5.0.1<sup>[2]</sup> To get the final spectra, the simulated spectra of the conformers were averaged according to the Boltzmann distribution theory and their relative Gibbs free energy ( $\Delta G$ ). By comparing the experiment spectra with the calculated model molecules, the absolute configuration of the chiral center was determined.

[1]. Sybyl Software, version X 2.0; Tripos Associates Inc.: St. Louis, MO, **2013**.

[2]. Neese, F. The ORCA program system, Wiley Interdiscip. Rev.: Comput. Mol. Sci. **2012**, 2, 73–78.

[3]. Stephens, P. J.; Harada, N. ECD Cotton effect approximated by the Gaussian curve and other methods. Chirality **2010**, 22, 229–233.

## (2) Results

Table S1.2.1. Gibbs free energies<sup>a</sup> and equilibrium populations<sup>b</sup> of low-energy conformers of (+)-1.

| Conformers          | $\Delta G$ (a.u.) | P(%) / 100 | G(a.u.)      |
|---------------------|-------------------|------------|--------------|
| (+)-1 000001_tddft_ | 0.00245           | 1.91       | -1576.450721 |
| (+)-1 000002_tddft_ | 0.00052           | 14.82      | -1576.452655 |
| (+)-1 000003_tddft_ | 0.00058           | 13.93      | -1576.452596 |
| (+)-1 000004_tddft_ | 0.00053           | 14.72      | -1576.452648 |
| (+)-1 000005_tddft_ | 0.0               | 25.71      | -1576.453175 |
| (+)-1 000006_tddft_ | 0.00837           | 0.0        | -1576.444804 |
| (+)-1 000007_tddft_ | 0.00055           | 14.44      | -1576.45263  |
| (+)-1 000009_tddft_ | 0.00054           | 14.46      | -1576.452631 |

<sup>a</sup>wB97M-V/def2-TZVP, in a.u.

<sup>b</sup>From  $\Delta G$  values at 298.15 K.

Table S1.2.2. Cartesian coordinates for the low-energy reoptimized random reseach conformers of (+)-**1** at B3LYP-D3(BJ)/6-31G\* level of theory in methanol.

| (+) -1 000001_en_ |               | Standard Orientation (A.U.) |            |           |           |
|-------------------|---------------|-----------------------------|------------|-----------|-----------|
| Center number     | Atomic number | Atomic Type                 | X          | Y         | Z         |
| 1                 | 6             | C                           | -8.529836  | 2.430752  | -1.932522 |
| 2                 | 6             | C                           | -11.997414 | 0.362102  | -4.289843 |
| 3                 | 6             | C                           | -10.478585 | 0.332591  | -1.783674 |
| 4                 | 6             | C                           | -12.373161 | 1.390948  | 0.205293  |
| 5                 | 6             | C                           | -11.728216 | 4.1695    | 0.783407  |
| 6                 | 6             | C                           | -9.270535  | 4.508691  | -0.602371 |
| 7                 | 6             | C                           | -6.47538   | 2.147748  | -3.751002 |
| 8                 | 8             | O                           | -6.534335  | 0.461028  | -5.342752 |
| 9                 | 6             | C                           | -11.450798 | 4.64307   | 3.662271  |
| 10                | 6             | C                           | -13.814698 | 5.880096  | -0.324314 |
| 11                | 6             | C                           | -9.315098  | 3.196598  | 4.838808  |
| 12                | 6             | C                           | -9.489264  | 1.091301  | 6.247314  |
| 13                | 6             | C                           | -7.151172  | -0.231392 | 7.180784  |
| 14                | 8             | O                           | -14.165843 | 0.287175  | 1.058445  |
| 15                | 8             | O                           | -8.191774  | 6.771657  | -0.399729 |
| 16                | 8             | O                           | -12.809064 | -1.794565 | -5.288952 |
| 17                | 6             | C                           | -12.319557 | -4.285766 | -4.305023 |
| 18                | 6             | C                           | -9.845531  | -4.510292 | -2.797427 |
| 19                | 6             | C                           | -9.246793  | -2.23279  | -1.073745 |
| 20                | 6             | C                           | -14.357915 | -5.1001   | -2.412223 |
| 21                | 6             | C                           | -13.146332 | -7.379102 | -1.109953 |
| 22                | 6             | C                           | -10.291521 | -6.733562 | -0.912896 |
| 23                | 6             | C                           | -4.270221  | 3.934079  | -3.681252 |
| 24                | 6             | C                           | -3.103358  | 4.601915  | -1.390272 |
| 25                | 6             | C                           | -0.991128  | 6.18953   | -1.389212 |
| 26                | 6             | C                           | -0.043515  | 7.124805  | -3.669592 |
| 27                | 6             | C                           | -1.182681  | 6.44055   | -5.957336 |
| 28                | 6             | C                           | -3.268746  | 4.831434  | -5.967267 |
| 29                | 6             | C                           | -12.256734 | -5.949354 | -6.659538 |
| 30                | 6             | C                           | -9.37111   | -5.627491 | 1.64809   |
| 31                | 8             | O                           | -12.537878 | 2.339711  | -5.286105 |
| 32                | 8             | O                           | -9.885898  | -2.975986 | 1.41658   |
| 33                | 6             | C                           | -6.517813  | -6.08165  | 1.943621  |
| 34                | 6             | C                           | -10.75968  | -6.570345 | 3.984774  |
| 35                | 1             | H                           | -9.143763  | -8.396813 | -1.389643 |
| 36                | 1             | H                           | -8.252048  | -4.811753 | -4.088713 |
| 37                | 6             | C                           | -11.940078 | -0.169099 | 6.94682   |
| 38                | 1             | H                           | -11.156354 | 6.689711  | 3.916062  |

|    |   |   |            |           |           |
|----|---|---|------------|-----------|-----------|
| 39 | 1 | H | -13.275659 | 4.168411  | 4.531935  |
| 40 | 1 | H | -13.334409 | 7.874401  | 0.009792  |
| 41 | 1 | H | -14.018869 | 5.557727  | -2.363853 |
| 42 | 1 | H | -15.617353 | 5.448604  | 0.615718  |
| 43 | 1 | H | -7.419631  | 3.920978  | 4.417395  |
| 44 | 1 | H | -5.411762  | 0.738132  | 6.584303  |
| 45 | 1 | H | -7.145015  | -0.376418 | 9.262206  |
| 46 | 1 | H | -7.089877  | -2.180619 | 6.445394  |
| 47 | 1 | H | -6.614602  | 6.82515   | -1.345554 |
| 48 | 1 | H | -7.194633  | -1.914624 | -1.165273 |
| 49 | 1 | H | -16.169307 | -5.522994 | -3.34138  |
| 50 | 1 | H | -14.67077  | -3.559221 | -1.050441 |
| 51 | 1 | H | -14.017549 | -7.802483 | 0.722546  |
| 52 | 1 | H | -13.383334 | -9.085902 | -2.274865 |
| 53 | 1 | H | -3.826231  | 3.830388  | 0.384383  |
| 54 | 1 | H | -0.077001  | 6.682437  | 0.394749  |
| 55 | 1 | H | 1.596935   | 8.378256  | -3.667881 |
| 56 | 1 | H | -0.430532  | 7.160581  | -7.73994  |
| 57 | 1 | H | -4.157623  | 4.245312  | -7.733956 |
| 58 | 1 | H | -14.071931 | -5.82573  | -7.663855 |
| 59 | 1 | H | -10.750234 | -5.30085  | -7.935608 |
| 60 | 1 | H | -11.896479 | -7.934701 | -6.167126 |
| 61 | 1 | H | -5.777572  | -4.965138 | 3.532715  |
| 62 | 1 | H | -6.140616  | -8.092221 | 2.319634  |
| 63 | 1 | H | -5.460356  | -5.556136 | 0.232335  |
| 64 | 1 | H | -12.740821 | -5.956563 | 3.965521  |
| 65 | 1 | H | -10.696693 | -8.646831 | 4.0862    |
| 66 | 1 | H | -9.872168  | -5.813534 | 5.704523  |
| 67 | 1 | H | -13.601001 | 1.029359  | 6.628317  |
| 68 | 1 | H | -12.191186 | -1.875022 | 5.785651  |
| 69 | 1 | H | -11.922871 | -0.76037  | 8.945401  |

| (+) -1 000002_en_ |               | Standard Orientation (A.U.) |            |           |           |
|-------------------|---------------|-----------------------------|------------|-----------|-----------|
| Center number     | Atomic number | Atomic Type                 | X          | Y         | Z         |
| 1                 | 6             | C                           | -7.708278  | 3.331418  | -1.04422  |
| 2                 | 6             | C                           | -11.420239 | 1.704439  | -3.553567 |
| 3                 | 6             | C                           | -9.703067  | 1.286349  | -1.248467 |
| 4                 | 6             | C                           | -11.485417 | 1.958506  | 1.038751  |
| 5                 | 6             | C                           | -10.444416 | 4.243191  | 2.496344  |
| 6                 | 6             | C                           | -8.089785  | 4.839676  | 1.036602  |
| 7                 | 6             | C                           | -5.425231  | 3.645568  | -2.50601  |
| 8                 | 8             | O                           | -3.806889  | 5.235627  | -1.863057 |
| 9                 | 6             | C                           | -9.763562  | 3.508243  | 5.276715  |
| 10                | 6             | C                           | -12.34579  | 6.440212  | 2.34201   |
| 11                | 6             | C                           | -11.973674 | 3.37324   | 7.047485  |
| 12                | 6             | C                           | -13.176251 | 1.289159  | 7.861229  |
| 13                | 6             | C                           | -15.38073  | 1.48166   | 9.651096  |
| 14                | 8             | O                           | -13.446026 | 0.908331  | 1.486262  |
| 15                | 8             | O                           | -6.559046  | 6.631233  | 1.789358  |
| 16                | 8             | O                           | -12.298218 | -0.274049 | -4.837896 |
| 17                | 6             | C                           | -11.782419 | -2.90101  | -4.299957 |
| 18                | 6             | C                           | -9.231026  | -3.371839 | -2.986073 |
| 19                | 6             | C                           | -8.502579  | -1.375657 | -0.994463 |
| 20                | 6             | C                           | -13.727071 | -4.009318 | -2.457185 |
| 21                | 6             | C                           | -12.460979 | -6.457203 | -1.581359 |
| 22                | 6             | C                           | -9.598959  | -5.840001 | -1.412672 |
| 23                | 6             | C                           | -4.909682  | 1.970634  | -4.729949 |
| 24                | 6             | C                           | -2.691616  | 0.516716  | -4.74875  |
| 25                | 6             | C                           | -2.194351  | -1.11836  | -6.756957 |
| 26                | 6             | C                           | -3.875394  | -1.264075 | -8.793455 |
| 27                | 6             | C                           | -6.047383  | 0.237085  | -8.815326 |
| 28                | 6             | C                           | -6.580536  | 1.836665  | -6.782394 |
| 29                | 6             | C                           | -11.856092 | -4.156015 | -6.8942   |
| 30                | 6             | C                           | -8.560598  | -5.10628  | 1.240857  |
| 31                | 8             | O                           | -12.01238  | 3.814231  | -4.187691 |
| 32                | 8             | O                           | -9.058424  | -2.441312 | 1.396915  |
| 33                | 6             | C                           | -5.699061  | -5.584035 | 1.353208  |
| 34                | 6             | C                           | -9.855907  | -6.354011 | 3.484014  |
| 35                | 1             | H                           | -8.475136  | -7.413963 | -2.167064 |
| 36                | 1             | H                           | -7.715328  | -3.501873 | -4.396539 |
| 37                | 6             | C                           | -12.503495 | -1.355316 | 7.072444  |
| 38                | 1             | H                           | -8.709484  | 1.717478  | 5.224691  |
| 39                | 1             | H                           | -8.436565  | 4.968754  | 5.942875  |
| 40                | 1             | H                           | -14.146068 | 5.863637  | 3.198467  |

|    |   |   |            |           |            |
|----|---|---|------------|-----------|------------|
| 41 | 1 | H | -11.602007 | 8.098708  | 3.351123   |
| 42 | 1 | H | -12.684635 | 6.9517    | 0.356405   |
| 43 | 1 | H | -12.669932 | 5.200179  | 7.729449   |
| 44 | 1 | H | -15.024405 | 0.391792  | 11.395354  |
| 45 | 1 | H | -15.789745 | 3.448534  | 10.184131  |
| 46 | 1 | H | -17.09901  | 0.667477  | 8.790073   |
| 47 | 1 | H | -5.101842  | 6.569893  | 0.547897   |
| 48 | 1 | H | -6.448859  | -1.089771 | -1.130311  |
| 49 | 1 | H | -15.581771 | -4.29336  | -3.352625  |
| 50 | 1 | H | -13.970094 | -2.69003  | -0.869925  |
| 51 | 1 | H | -13.249376 | -7.166954 | 0.199591   |
| 52 | 1 | H | -12.75391  | -7.963313 | -2.986203  |
| 53 | 1 | H | -1.374776  | 0.670549  | -3.167176  |
| 54 | 1 | H | -0.480193  | -2.269161 | -6.745495  |
| 55 | 1 | H | -3.477086  | -2.532545 | -10.373149 |
| 56 | 1 | H | -7.339848  | 0.170733  | -10.423531 |
| 57 | 1 | H | -8.261521  | 3.026406  | -6.820783  |
| 58 | 1 | H | -10.393507 | -3.326903 | -8.114972  |
| 59 | 1 | H | -11.505021 | -6.197622 | -6.74484   |
| 60 | 1 | H | -13.711778 | -3.858252 | -7.780802  |
| 61 | 1 | H | -4.896569  | -4.662629 | 3.035889   |
| 62 | 1 | H | -5.30647   | -7.6235   | 1.465046   |
| 63 | 1 | H | -4.714578  | -4.849213 | -0.324654  |
| 64 | 1 | H | -11.839194 | -5.767139 | 3.622445   |
| 65 | 1 | H | -9.772442  | -8.425189 | 3.314922   |
| 66 | 1 | H | -8.909122  | -5.80802  | 5.251566   |
| 67 | 1 | H | -10.917515 | -1.440837 | 5.747328   |
| 68 | 1 | H | -12.060494 | -2.532124 | 8.738664   |
| 69 | 1 | H | -14.135082 | -2.243886 | 6.126062   |



| (+)-1 000003_en_ |               | Standard Orientation (A.U.) |            |           |           |
|------------------|---------------|-----------------------------|------------|-----------|-----------|
| Center number    | Atomic number | Atomic Type                 | X          | Y         | Z         |
| 1                | 6             | C                           | -7.662824  | 3.283908  | -1.080774 |
| 2                | 6             | C                           | -11.473447 | 1.882102  | -3.576741 |
| 3                | 6             | C                           | -9.735264  | 1.321577  | -1.317544 |
| 4                | 6             | C                           | -11.456566 | 1.983787  | 1.019013  |
| 5                | 6             | C                           | -10.309725 | 4.180662  | 2.530557  |
| 6                | 6             | C                           | -7.959062  | 4.740261  | 1.050939  |
| 7                | 6             | C                           | -5.393799  | 3.568022  | -2.570101 |
| 8                | 8             | O                           | -3.715693  | 5.086769  | -1.906651 |
| 9                | 6             | C                           | -9.610564  | 3.33286   | 5.273774  |
| 10               | 6             | C                           | -12.134174 | 6.446677  | 2.479585  |
| 11               | 6             | C                           | -11.795814 | 3.217781  | 7.076673  |
| 12               | 6             | C                           | -13.06282  | 1.152244  | 7.838311  |
| 13               | 6             | C                           | -15.230215 | 1.363115  | 9.670725  |
| 14               | 8             | O                           | -13.449645 | 0.994801  | 1.462716  |
| 15               | 8             | O                           | -6.355802  | 6.454548  | 1.831446  |
| 16               | 8             | O                           | -12.457695 | -0.017486 | -4.902442 |
| 17               | 6             | C                           | -12.030996 | -2.678867 | -4.466343 |
| 18               | 6             | C                           | -9.477609  | -3.290138 | -3.214093 |
| 19               | 6             | C                           | -8.636219  | -1.391941 | -1.172011 |
| 20               | 6             | C                           | -13.987096 | -3.780463 | -2.631864 |
| 21               | 6             | C                           | -12.799069 | -6.301975 | -1.861457 |
| 22               | 6             | C                           | -9.914562  | -5.794387 | -1.717248 |
| 23               | 6             | C                           | -4.964516  | 1.946713  | -4.851071 |
| 24               | 6             | C                           | -2.78737   | 0.435399  | -4.953901 |
| 25               | 6             | C                           | -2.368606  | -1.148639 | -7.020035 |
| 26               | 6             | C                           | -4.087299  | -1.185699 | -9.0298   |
| 27               | 6             | C                           | -6.217545  | 0.37294   | -8.96715  |
| 28               | 6             | C                           | -6.672688  | 1.921628  | -6.876774 |
| 29               | 6             | C                           | -12.193594 | -3.836259 | -7.101788 |
| 30               | 6             | C                           | -8.809326  | -5.190193 | 0.941918  |
| 31               | 8             | O                           | -11.989316 | 4.033321  | -4.133809 |
| 32               | 8             | O                           | -9.19402   | -2.514012 | 1.192863  |
| 33               | 6             | C                           | -5.968561  | -5.787769 | 0.99435   |
| 34               | 6             | C                           | -10.123878 | -6.457718 | 3.162654  |
| 35               | 1             | H                           | -8.861274  | -7.382399 | -2.540958 |
| 36               | 1             | H                           | -7.993059  | -3.432012 | -4.656245 |
| 37               | 6             | C                           | -12.502436 | -1.485638 | 6.946155  |
| 38               | 1             | H                           | -8.620485  | 1.509525  | 5.147216  |
| 39               | 1             | H                           | -8.22283   | 4.724414  | 5.963303  |
| 40               | 1             | H                           | -13.940792 | 5.903142  | 3.344049  |

|    |   |   |            |           |            |
|----|---|---|------------|-----------|------------|
| 41 | 1 | H | -11.318786 | 8.043148  | 3.532484   |
| 42 | 1 | H | -12.483074 | 7.037128  | 0.517777   |
| 43 | 1 | H | -12.412643 | 5.044084  | 7.832557   |
| 44 | 1 | H | -14.885704 | 0.203379  | 11.371718  |
| 45 | 1 | H | -15.559039 | 3.32441   | 10.275048  |
| 46 | 1 | H | -16.990353 | 0.640225  | 8.812705   |
| 47 | 1 | H | -4.922558  | 6.381534  | 0.56158    |
| 48 | 1 | H | -6.575204  | -1.18147  | -1.336814  |
| 49 | 1 | H | -15.864091 | -3.964871 | -3.50663   |
| 50 | 1 | H | -14.158295 | -2.510416 | -0.995763  |
| 51 | 1 | H | -13.586446 | -7.044331 | -0.093418  |
| 52 | 1 | H | -13.167578 | -7.746398 | -3.312512  |
| 53 | 1 | H | -1.440585  | 0.505465  | -3.39182   |
| 54 | 1 | H | -0.686868  | -2.345173 | -7.074369  |
| 55 | 1 | H | -3.750585  | -2.41436  | -10.654635 |
| 56 | 1 | H | -7.537506  | 0.392284  | -10.554164 |
| 57 | 1 | H | -8.318483  | 3.159683  | -6.849943  |
| 58 | 1 | H | -10.719585 | -3.01995  | -8.317407  |
| 59 | 1 | H | -11.920337 | -5.89398  | -7.031868  |
| 60 | 1 | H | -14.050111 | -3.434717 | -7.944466  |
| 61 | 1 | H | -5.659367  | -7.844171 | 1.031033   |
| 62 | 1 | H | -4.978695  | -5.0354   | -0.672574  |
| 63 | 1 | H | -5.106045  | -4.958112 | 2.694956   |
| 64 | 1 | H | -9.129365  | -6.012534 | 4.932214   |
| 65 | 1 | H | -12.078304 | -5.792879 | 3.350781   |
| 66 | 1 | H | -10.130358 | -8.523736 | 2.923994   |
| 67 | 1 | H | -12.099381 | -2.74214  | 8.563403   |
| 68 | 1 | H | -14.17288  | -2.269494 | 5.975482   |
| 69 | 1 | H | -10.927344 | -1.584391 | 5.608889   |

| (+) -1 000004_en_ |               | Standard Orientation (A.U.) |            |           |           |
|-------------------|---------------|-----------------------------|------------|-----------|-----------|
| Center number     | Atomic number | Atomic Type                 | X          | Y         | Z         |
| 1                 | 6             | C                           | -7.567852  | 3.373303  | -1.17485  |
| 2                 | 6             | C                           | -11.071521 | 2.267808  | -4.234514 |
| 3                 | 6             | C                           | -9.809705  | 1.665495  | -1.696734 |
| 4                 | 6             | C                           | -11.754731 | 2.621302  | 0.340963  |
| 5                 | 6             | C                           | -10.443635 | 4.38423   | 2.232368  |
| 6                 | 6             | C                           | -7.934632  | 4.797195  | 0.972447  |
| 7                 | 6             | C                           | -5.083075  | 3.3472    | -2.312415 |
| 8                 | 8             | O                           | -3.361199  | 4.695909  | -1.424588 |
| 9                 | 6             | C                           | -10.005012 | 3.003449  | 4.794038  |
| 10                | 6             | C                           | -11.938567 | 6.851574  | 2.544409  |
| 11                | 6             | C                           | -12.367279 | 1.997272  | 6.01672   |
| 12                | 6             | C                           | -12.446875 | 0.236633  | 7.843742  |
| 13                | 6             | C                           | -14.922164 | -0.653398 | 8.929363  |
| 14                | 8             | O                           | -13.976143 | 2.153336  | 0.3352    |
| 15                | 8             | O                           | -6.25476   | 6.298827  | 1.989255  |
| 16                | 8             | O                           | -12.131627 | 0.410143  | -5.569044 |
| 17                | 6             | C                           | -12.277109 | -2.219102 | -4.84952  |
| 18                | 6             | C                           | -10.094712 | -3.114795 | -3.141297 |
| 19                | 6             | C                           | -9.137365  | -1.149912 | -1.220545 |
| 20                | 6             | C                           | -14.667436 | -2.766702 | -3.30114  |
| 21                | 6             | C                           | -14.088369 | -5.31571  | -2.064938 |
| 22                | 6             | C                           | -11.216668 | -5.27631  | -1.477219 |
| 23                | 6             | C                           | -4.459863  | 1.545639  | -4.40401  |
| 24                | 6             | C                           | -2.36625   | -0.052917 | -4.080663 |
| 25                | 6             | C                           | -1.753264  | -1.831667 | -5.926705 |
| 26                | 6             | C                           | -3.189972  | -1.989147 | -8.141457 |
| 27                | 6             | C                           | -5.226153  | -0.34775  | -8.506283 |
| 28                | 6             | C                           | -5.872985  | 1.408163  | -6.642741 |
| 29                | 6             | C                           | -12.24808  | -3.618736 | -7.369575 |
| 30                | 6             | C                           | -10.399831 | -4.549429 | 1.25988   |
| 31                | 8             | O                           | -11.135645 | 4.403703  | -5.026398 |
| 32                | 8             | O                           | -10.106712 | -1.856927 | 1.169206  |
| 33                | 6             | C                           | -7.846393  | -5.772705 | 1.885873  |
| 34                | 6             | C                           | -12.318575 | -5.08656  | 3.334317  |
| 35                | 1             | H                           | -10.375829 | -7.113993 | -1.950077 |
| 36                | 1             | H                           | -8.496925  | -3.730204 | -4.312379 |
| 37                | 6             | C                           | -10.127753 | -0.959077 | 8.982731  |
| 38                | 1             | H                           | -8.67443   | 1.441204  | 4.459601  |
| 39                | 1             | H                           | -9.026719  | 4.369832  | 6.032551  |
| 40                | 1             | H                           | -10.901594 | 8.146019  | 3.796296  |

|    |   |   |            |           |            |
|----|---|---|------------|-----------|------------|
| 41 | 1 | H | -12.208562 | 7.778088  | 0.703337   |
| 42 | 1 | H | -13.808998 | 6.468088  | 3.356318   |
| 43 | 1 | H | -14.166355 | 2.743078  | 5.326105   |
| 44 | 1 | H | -14.991757 | -0.355443 | 10.994491  |
| 45 | 1 | H | -16.543457 | 0.327637  | 8.076392   |
| 46 | 1 | H | -15.168662 | -2.704406 | 8.623378   |
| 47 | 1 | H | -4.705848  | 6.102522  | 0.871191   |
| 48 | 1 | H | -7.060571  | -1.26818  | -1.181868  |
| 49 | 1 | H | -16.374128 | -2.781287 | -4.488578  |
| 50 | 1 | H | -14.900314 | -1.275922 | -1.874054  |
| 51 | 1 | H | -15.259757 | -5.670523 | -0.391703  |
| 52 | 1 | H | -14.484865 | -6.866276 | -3.394194  |
| 53 | 1 | H | -1.24239   | 0.110006  | -2.358103  |
| 54 | 1 | H | -0.141157  | -3.090708 | -5.646152  |
| 55 | 1 | H | -2.703995  | -3.375863 | -9.592046  |
| 56 | 1 | H | -6.318796  | -0.419387 | -10.256554 |
| 57 | 1 | H | -7.421433  | 2.724455  | -6.965554  |
| 58 | 1 | H | -10.477242 | -3.21651  | -8.380931  |
| 59 | 1 | H | -12.388127 | -5.671545 | -7.081222  |
| 60 | 1 | H | -13.842798 | -2.998541 | -8.548409  |
| 61 | 1 | H | -6.444298  | -5.426769 | 0.387576   |
| 62 | 1 | H | -7.102601  | -4.995118 | 3.665231   |
| 63 | 1 | H | -8.04916   | -7.832306 | 2.09774    |
| 64 | 1 | H | -12.828607 | -7.102215 | 3.372498   |
| 65 | 1 | H | -11.514667 | -4.574835 | 5.17833    |
| 66 | 1 | H | -14.030453 | -3.947363 | 3.062487   |
| 67 | 1 | H | -9.802123  | -0.239036 | 10.915527  |
| 68 | 1 | H | -10.366593 | -3.022819 | 9.164142   |
| 69 | 1 | H | -8.404526  | -0.603731 | 7.881144   |

| (+) -1 000005_en_ |               | Standard Orientation (A.U.) |            |           |           |
|-------------------|---------------|-----------------------------|------------|-----------|-----------|
| Center number     | Atomic number | Atomic Type                 | X          | Y         | Z         |
| 1                 | 6             | C                           | -7.676377  | 3.215859  | -0.850121 |
| 2                 | 6             | C                           | -11.281656 | 1.89979   | -3.697304 |
| 3                 | 6             | C                           | -9.693186  | 1.243613  | -1.362306 |
| 4                 | 6             | C                           | -11.535712 | 1.689303  | 0.929249  |
| 5                 | 6             | C                           | -10.311672 | 3.450702  | 2.873465  |
| 6                 | 6             | C                           | -8.033857  | 4.366261  | 1.457164  |
| 7                 | 6             | C                           | -5.348764  | 3.686789  | -2.198699 |
| 8                 | 8             | O                           | -3.759323  | 5.199975  | -1.33006  |
| 9                 | 6             | C                           | -9.412788  | 1.904721  | 5.239642  |
| 10                | 6             | C                           | -12.124024 | 5.586747  | 3.611952  |
| 11                | 6             | C                           | -11.512562 | 0.619909  | 6.638651  |
| 12                | 6             | C                           | -12.541673 | 1.317819  | 8.855481  |
| 13                | 6             | C                           | -14.661683 | -0.188687 | 10.014756 |
| 14                | 8             | O                           | -13.647667 | 0.868771  | 1.070484  |
| 15                | 8             | O                           | -6.497496  | 6.012711  | 2.478348  |
| 16                | 8             | O                           | -12.180625 | 0.048519  | -5.154799 |
| 17                | 6             | C                           | -11.860467 | -2.629969 | -4.743419 |
| 18                | 6             | C                           | -9.406679  | -3.34059  | -3.344557 |
| 19                | 6             | C                           | -8.581519  | -1.469617 | -1.273877 |
| 20                | 6             | C                           | -13.967256 | -3.708093 | -3.065966 |
| 21                | 6             | C                           | -12.897171 | -6.25979  | -2.227438 |
| 22                | 6             | C                           | -10.018596 | -5.828063 | -1.878083 |
| 23                | 6             | C                           | -4.704298  | 2.209372  | -4.524892 |
| 24                | 6             | C                           | -2.416411  | 0.865408  | -4.556346 |
| 25                | 6             | C                           | -1.775372  | -0.618418 | -6.638822 |
| 26                | 6             | C                           | -3.384138  | -0.723142 | -8.735035 |
| 27                | 6             | C                           | -5.62383   | 0.675492  | -8.743383 |
| 28                | 6             | C                           | -6.295809  | 2.128266  | -6.642641 |
| 29                | 6             | C                           | -11.886467 | -3.738079 | -7.405062 |
| 30                | 6             | C                           | -9.054091  | -5.279454 | 0.851934  |
| 31                | 8             | O                           | -11.743931 | 4.069338  | -4.218437 |
| 32                | 8             | O                           | -9.219318  | -2.583235 | 1.074869  |
| 33                | 6             | C                           | -6.285058  | -6.105553 | 1.103885  |
| 34                | 6             | C                           | -10.631594 | -6.364746 | 2.998773  |
| 35                | 1             | H                           | -8.962566  | -7.443286 | -2.642127 |
| 36                | 1             | H                           | -7.85622   | -3.553448 | -4.706077 |
| 37                | 6             | C                           | -11.745026 | 3.599375  | 10.359862 |
| 38                | 1             | H                           | -8.065587  | 0.468965  | 4.569733  |
| 39                | 1             | H                           | -8.366532  | 3.235678  | 6.442817  |
| 40                | 1             | H                           | -13.794629 | 4.784524  | 4.545485  |

|    |   |   |            |           |            |
|----|---|---|------------|-----------|------------|
| 41 | 1 | H | -11.175408 | 6.900831  | 4.912363   |
| 42 | 1 | H | -12.739045 | 6.640861  | 1.929321   |
| 43 | 1 | H | -12.28766  | -1.052396 | 5.702125   |
| 44 | 1 | H | -16.356696 | 0.999707  | 10.28281   |
| 45 | 1 | H | -15.19379  | -1.81665  | 8.83783    |
| 46 | 1 | H | -14.132842 | -0.891812 | 11.907876  |
| 47 | 1 | H | -5.058011  | 6.164768  | 1.21775    |
| 48 | 1 | H | -6.514774  | -1.269544 | -1.393356  |
| 49 | 1 | H | -15.776825 | -3.847059 | -4.080108  |
| 50 | 1 | H | -14.238992 | -2.443339 | -1.441622  |
| 51 | 1 | H | -13.826449 | -6.991151 | -0.524414  |
| 52 | 1 | H | -13.194534 | -7.689524 | -3.709275  |
| 53 | 1 | H | -1.161367  | 0.986916  | -2.92294   |
| 54 | 1 | H | -0.00738   | -1.68477  | -6.636131  |
| 55 | 1 | H | -2.876308  | -1.875482 | -10.371335 |
| 56 | 1 | H | -6.858565  | 0.64937   | -10.397571 |
| 57 | 1 | H | -8.016768  | 3.25672   | -6.681377  |
| 58 | 1 | H | -10.312702 | -2.952656 | -8.512033  |
| 59 | 1 | H | -11.685958 | -5.805152 | -7.354216  |
| 60 | 1 | H | -13.670938 | -3.262339 | -8.357402  |
| 61 | 1 | H | -5.120339  | -5.370053 | -0.455442  |
| 62 | 1 | H | -5.493596  | -5.404801 | 2.894173   |
| 63 | 1 | H | -6.133384  | -8.180076 | 1.079998   |
| 64 | 1 | H | -10.767287 | -8.43479  | 2.853207   |
| 65 | 1 | H | -9.754472  | -5.893685 | 4.824033   |
| 66 | 1 | H | -12.543302 | -5.557805 | 2.987957   |
| 67 | 1 | H | -11.24302  | 3.058176  | 12.311137  |
| 68 | 1 | H | -10.130623 | 4.606021  | 9.53459    |
| 69 | 1 | H | -13.326131 | 4.952452  | 10.514205  |

| (+)-1 000006_en_ |               | Standard Orientation (A.U.) |            |           |           |
|------------------|---------------|-----------------------------|------------|-----------|-----------|
| Center number    | Atomic number | Atomic Type                 | X          | Y         | Z         |
| 1                | 6             | C                           | -8.563632  | 1.764785  | -1.202284 |
| 2                | 6             | C                           | -11.082754 | -0.134706 | -4.651484 |
| 3                | 6             | C                           | -10.443695 | -0.319266 | -1.805646 |
| 4                | 6             | C                           | -12.848256 | 0.581184  | -0.369285 |
| 5                | 6             | C                           | -12.34029  | 3.128318  | 0.919939  |
| 6                | 6             | C                           | -9.606793  | 3.576822  | 0.295924  |
| 7                | 6             | C                           | -6.026097  | 1.738772  | -2.313231 |
| 8                | 8             | O                           | -5.030411  | -0.202368 | -3.090807 |
| 9                | 6             | C                           | -12.861935 | 3.026212  | 3.805055  |
| 10               | 6             | C                           | -14.024295 | 5.141593  | -0.353442 |
| 11               | 6             | C                           | -11.105291 | 1.275819  | 5.175817  |
| 12               | 6             | C                           | -9.175168  | 1.897193  | 6.705139  |
| 13               | 6             | C                           | -7.510322  | -0.136868 | 7.805218  |
| 14               | 8             | O                           | -14.864781 | -0.468915 | -0.35801  |
| 15               | 8             | O                           | -8.586168  | 5.677213  | 1.238302  |
| 16               | 8             | O                           | -11.828946 | -2.186421 | -5.899213 |
| 17               | 6             | C                           | -12.102993 | -4.712802 | -4.866442 |
| 18               | 6             | C                           | -10.337208 | -5.238206 | -2.617594 |
| 19               | 6             | C                           | -9.545723  | -2.970945 | -0.948155 |
| 20               | 6             | C                           | -14.834911 | -5.174078 | -3.906088 |
| 21               | 6             | C                           | -14.626374 | -6.294066 | -1.229115 |
| 22               | 6             | C                           | -11.817346 | -6.956403 | -0.7841   |
| 23               | 6             | C                           | -4.647208  | 4.210308  | -2.58192  |
| 24               | 6             | C                           | -2.093732  | 4.383482  | -1.88698  |
| 25               | 6             | C                           | -0.778673  | 6.640173  | -2.243552 |
| 26               | 6             | C                           | -1.986506  | 8.714649  | -3.354397 |
| 27               | 6             | C                           | -4.512328  | 8.532262  | -4.107312 |
| 28               | 6             | C                           | -5.850289  | 6.290453  | -3.715048 |
| 29               | 6             | C                           | -11.460992 | -6.432865 | -7.087872 |
| 30               | 6             | C                           | -10.757914 | -6.174253 | 1.825163  |
| 31               | 8             | O                           | -10.966942 | 1.869771  | -5.737396 |
| 32               | 8             | O                           | -10.429431 | -3.495173 | 1.536745  |
| 33               | 6             | C                           | -8.195682  | -7.434934 | 2.332227  |
| 34               | 6             | C                           | -12.52214  | -6.589046 | 4.061552  |
| 35               | 1             | H                           | -11.453341 | -8.969042 | -1.159255 |
| 36               | 1             | H                           | -8.60628   | -6.138872 | -3.320504 |
| 37               | 6             | C                           | -8.461281  | 4.552017  | 7.438553  |
| 38               | 1             | H                           | -12.759342 | 4.967263  | 4.537636  |
| 39               | 1             | H                           | -14.834597 | 2.388162  | 4.021111  |
| 40               | 1             | H                           | -13.586348 | 7.019     | 0.422259  |

|    |   |   |            |           |           |
|----|---|---|------------|-----------|-----------|
| 41 | 1 | H | -13.711426 | 5.171618  | -2.408382 |
| 42 | 1 | H | -16.021305 | 4.69765   | 0.009751  |
| 43 | 1 | H | -11.363845 | -0.724727 | 4.737335  |
| 44 | 1 | H | -7.580735  | -0.12977  | 9.891922  |
| 45 | 1 | H | -8.060916  | -2.023734 | 7.130704  |
| 46 | 1 | H | -5.513759  | 0.179879  | 7.283462  |
| 47 | 1 | H | -6.890601  | 5.91869   | 0.5682    |
| 48 | 1 | H | -7.476468  | -2.880886 | -0.94923  |
| 49 | 1 | H | -15.830527 | -6.442653 | -5.217902 |
| 50 | 1 | H | -15.869976 | -3.379264 | -3.875296 |
| 51 | 1 | H | -15.218521 | -4.844528 | 0.125781  |
| 52 | 1 | H | -15.853023 | -7.948737 | -0.952447 |
| 53 | 1 | H | -1.165002  | 2.730214  | -1.073333 |
| 54 | 1 | H | 1.200122   | 6.782176  | -1.672074 |
| 55 | 1 | H | -0.948311  | 10.475137 | -3.648022 |
| 56 | 1 | H | -5.440988  | 10.136169 | -5.016437 |
| 57 | 1 | H | -7.811446  | 6.097415  | -4.331792 |
| 58 | 1 | H | -12.76474  | -6.080036 | -8.667674 |
| 59 | 1 | H | -9.517088  | -6.087294 | -7.738218 |
| 60 | 1 | H | -11.634836 | -8.425141 | -6.515983 |
| 61 | 1 | H | -7.332965  | -6.619028 | 4.039112  |
| 62 | 1 | H | -8.428861  | -9.481279 | 2.625865  |
| 63 | 1 | H | -6.870637  | -7.164194 | 0.753377  |
| 64 | 1 | H | -14.288332 | -5.527165 | 3.83316   |
| 65 | 1 | H | -12.975769 | -8.608633 | 4.266109  |
| 66 | 1 | H | -11.609073 | -5.947625 | 5.816614  |
| 67 | 1 | H | -8.515622  | 4.781462  | 9.512282  |
| 68 | 1 | H | -6.50148   | 4.961377  | 6.850777  |
| 69 | 1 | H | -9.679395  | 5.996512  | 6.586452  |



| (+) -1 000007_en_ |               | Standard Orientation (A.U.) |            |           |           |
|-------------------|---------------|-----------------------------|------------|-----------|-----------|
| Center number     | Atomic number | Atomic Type                 | X          | Y         | Z         |
| 1                 | 6             | C                           | -7.451072  | 3.244835  | -0.838984 |
| 2                 | 6             | C                           | -11.561173 | 2.333054  | -3.060112 |
| 3                 | 6             | C                           | -9.645258  | 1.419874  | -1.076467 |
| 4                 | 6             | C                           | -11.084052 | 1.875137  | 1.491612  |
| 5                 | 6             | C                           | -9.663166  | 3.815528  | 3.116248  |
| 6                 | 6             | C                           | -7.456272  | 4.458154  | 1.459386  |
| 7                 | 6             | C                           | -5.329917  | 3.608806  | -2.518107 |
| 8                 | 8             | O                           | -3.524858  | 4.98433   | -1.874179 |
| 9                 | 6             | C                           | -8.717564  | 2.595379  | 5.63879   |
| 10                | 6             | C                           | -11.352104 | 6.14397   | 3.550242  |
| 11                | 6             | C                           | -10.686531 | 2.376831  | 7.666894  |
| 12                | 6             | C                           | -11.991037 | 0.30445   | 8.341744  |
| 13                | 6             | C                           | -13.90936  | 0.409431  | 10.441536 |
| 14                | 8             | O                           | -13.078014 | 0.935626  | 2.030001  |
| 15                | 8             | O                           | -5.701868  | 6.014007  | 2.24675   |
| 16                | 8             | O                           | -12.803253 | 0.65584   | -4.466927 |
| 17                | 6             | C                           | -12.501606 | -2.05682  | -4.381794 |
| 18                | 6             | C                           | -9.874084  | -2.941096 | -3.499821 |
| 19                | 6             | C                           | -8.704855  | -1.341979 | -1.364579 |
| 20                | 6             | C                           | -14.318772 | -3.267308 | -2.475299 |
| 21                | 6             | C                           | -13.220633 | -5.920732 | -2.136448 |
| 22                | 6             | C                           | -10.310495 | -5.57961  | -2.253308 |
| 23                | 6             | C                           | -5.190604  | 2.22256   | -4.982857 |
| 24                | 6             | C                           | -3.080856  | 0.685547  | -5.453875 |
| 25                | 6             | C                           | -2.917129  | -0.694452 | -7.694513 |
| 26                | 6             | C                           | -4.82704   | -0.496732 | -9.513184 |
| 27                | 6             | C                           | -6.892243  | 1.091388  | -9.083322 |
| 28                | 6             | C                           | -7.090546  | 2.434994  | -6.818168 |
| 29                | 6             | C                           | -13.015986 | -2.885821 | -7.094928 |
| 30                | 6             | C                           | -8.901146  | -5.35232  | 0.319319  |
| 31                | 8             | O                           | -11.980349 | 4.559639  | -3.325233 |
| 32                | 8             | O                           | -9.08083   | -2.707115 | 0.9063    |
| 33                | 6             | C                           | -6.116516  | -6.105457 | -0.004889 |
| 34                | 6             | C                           | -10.064541 | -6.797445 | 2.516116  |
| 35                | 1             | H                           | -9.449337  | -7.109143 | -3.361489 |
| 36                | 1             | H                           | -8.560282  | -2.992611 | -5.104148 |
| 37                | 6             | C                           | -11.71567  | -2.233683 | 7.097546  |
| 38                | 1             | H                           | -7.874069  | 0.752181  | 5.179263  |
| 39                | 1             | H                           | -7.170531  | 3.815032  | 6.314588  |
| 40                | 1             | H                           | -10.340694 | 7.556733  | 4.691517  |

|    |   |   |            |           |            |
|----|---|---|------------|-----------|------------|
| 41 | 1 | H | -11.87471  | 6.9959    | 1.728129   |
| 42 | 1 | H | -13.083785 | 5.570886  | 4.539756   |
| 43 | 1 | H | -11.089055 | 4.128048  | 8.695702   |
| 44 | 1 | H | -13.440957 | -0.955225 | 11.950186  |
| 45 | 1 | H | -14.038372 | 2.301361  | 11.292239  |
| 46 | 1 | H | -15.801317 | -0.119991 | 9.736773   |
| 47 | 1 | H | -4.412247  | 6.035112  | 0.828695   |
| 48 | 1 | H | -6.663964  | -1.214365 | -1.734711  |
| 49 | 1 | H | -16.286022 | -3.249286 | -3.147757  |
| 50 | 1 | H | -14.233002 | -2.195797 | -0.696649  |
| 51 | 1 | H | -13.867592 | -6.832617 | -0.390835  |
| 52 | 1 | H | -13.825943 | -7.156648 | -3.696291  |
| 53 | 1 | H | -1.583882  | 0.574151  | -4.037888  |
| 54 | 1 | H | -1.286015  | -1.913836 | -8.034391  |
| 55 | 1 | H | -4.690669  | -1.564311 | -11.275153 |
| 56 | 1 | H | -8.361535  | 1.295769  | -10.518987 |
| 57 | 1 | H | -8.684891  | 3.701153  | -6.507114  |
| 58 | 1 | H | -12.869814 | -4.948963 | -7.284165  |
| 59 | 1 | H | -14.921907 | -2.293103 | -7.67324   |
| 60 | 1 | H | -11.630355 | -2.010695 | -8.372181  |
| 61 | 1 | H | -5.249949  | -5.211329 | -1.670874  |
| 62 | 1 | H | -5.03144   | -5.540176 | 1.676546   |
| 63 | 1 | H | -5.945099  | -8.164895 | -0.240346  |
| 64 | 1 | H | -10.224147 | -8.819506 | 2.057241   |
| 65 | 1 | H | -8.873538  | -6.605579 | 4.207977   |
| 66 | 1 | H | -11.944877 | -6.058019 | 2.977474   |
| 67 | 1 | H | -11.201184 | -3.69196  | 8.499686   |
| 68 | 1 | H | -13.538909 | -2.812664 | 6.268632   |
| 69 | 1 | H | -10.322762 | -2.252367 | 5.568308   |

| (+) -1 000009_en_ |               | Standard Orientation (A.U.) |            |           |           |
|-------------------|---------------|-----------------------------|------------|-----------|-----------|
| Center number     | Atomic number | Atomic Type                 | X          | Y         | Z         |
| 1                 | 6             | C                           | -7.517621  | 3.394769  | -1.088376 |
| 2                 | 6             | C                           | -11.014644 | 2.321328  | -4.167842 |
| 3                 | 6             | C                           | -9.77039   | 1.705674  | -1.624598 |
| 4                 | 6             | C                           | -11.717808 | 2.673018  | 0.404926  |
| 5                 | 6             | C                           | -10.402207 | 4.421169  | 2.306802  |
| 6                 | 6             | C                           | -7.883272  | 4.816132  | 1.060963  |
| 7                 | 6             | C                           | -5.027264  | 3.349797  | -2.212822 |
| 8                 | 8             | O                           | -3.298154  | 4.680718  | -1.311949 |
| 9                 | 6             | C                           | -9.988587  | 3.032646  | 4.868475  |
| 10                | 6             | C                           | -11.878422 | 6.900046  | 2.615859  |
| 11                | 6             | C                           | -12.365323 | 2.041637  | 6.075461  |
| 12                | 6             | C                           | -12.468025 | 0.279682  | 7.900012  |
| 13                | 6             | C                           | -14.955634 | -0.594992 | 8.969645  |
| 14                | 8             | O                           | -13.942997 | 2.22347   | 0.386852  |
| 15                | 8             | O                           | -6.195542  | 6.300057  | 2.09033   |
| 16                | 8             | O                           | -12.076874 | 0.472981  | -5.513696 |
| 17                | 6             | C                           | -12.248834 | -2.155471 | -4.797258 |
| 18                | 6             | C                           | -10.084219 | -3.070774 | -3.076852 |
| 19                | 6             | C                           | -9.121595  | -1.115476 | -1.149    |
| 20                | 6             | C                           | -14.652854 | -2.684066 | -3.263357 |
| 21                | 6             | C                           | -14.102631 | -5.238427 | -2.025117 |
| 22                | 6             | C                           | -11.2341   | -5.224055 | -1.421195 |
| 23                | 6             | C                           | -4.408422  | 1.549162  | -4.306371 |
| 24                | 6             | C                           | -2.327612  | -0.065098 | -3.978287 |
| 25                | 6             | C                           | -1.719051  | -1.842897 | -5.826617 |
| 26                | 6             | C                           | -3.147246  | -1.984098 | -8.048028 |
| 27                | 6             | C                           | -5.170109  | -0.327357 | -8.417104 |
| 28                | 6             | C                           | -5.812556  | 1.428131  | -6.551616 |
| 29                | 6             | C                           | -12.216884 | -3.553423 | -7.318126 |
| 30                | 6             | C                           | -10.425565 | -4.507511 | 1.321054  |
| 31                | 8             | O                           | -11.061947 | 4.459487  | -4.954666 |
| 32                | 8             | O                           | -10.107593 | -1.817544 | 1.235448  |
| 33                | 6             | C                           | -7.886359  | -5.753672 | 1.959396  |
| 34                | 6             | C                           | -12.360523 | -5.030024 | 3.384081  |
| 35                | 1             | H                           | -10.406496 | -7.06838  | -1.891523 |
| 36                | 1             | H                           | -8.484827  | -3.699769 | -4.238404 |
| 37                | 6             | C                           | -10.163224 | -0.932309 | 9.050913  |
| 38                | 1             | H                           | -8.666893  | 1.461798  | 4.539704  |
| 39                | 1             | H                           | -9.008245  | 4.390545  | 6.11471   |
| 40                | 1             | H                           | -10.838611 | 8.182979  | 3.877185  |

|    |   |   |            |           |           |
|----|---|---|------------|-----------|-----------|
| 41 | 1 | H | -12.129831 | 7.833319  | 0.775551  |
| 42 | 1 | H | -13.756953 | 6.530173  | 3.41543   |
| 43 | 1 | H | -14.154993 | 2.800166  | 5.374334  |
| 44 | 1 | H | -15.036583 | -0.297698 | 11.034436 |
| 45 | 1 | H | -16.565133 | 0.396786  | 8.106799  |
| 46 | 1 | H | -15.213306 | -2.644213 | 8.660875  |
| 47 | 1 | H | -4.642635  | 6.093108  | 0.97934   |
| 48 | 1 | H | -7.045958  | -1.249309 | -1.100504 |
| 49 | 1 | H | -16.3526   | -2.683435 | -4.460797 |
| 50 | 1 | H | -14.881861 | -1.192299 | -1.836706 |
| 51 | 1 | H | -15.286491 | -5.584325 | -0.358823 |
| 52 | 1 | H | -14.504664 | -6.784838 | -3.357557 |
| 53 | 1 | H | -1.21025   | 0.085328  | -2.250375 |
| 54 | 1 | H | -0.117014  | -3.113964 | -5.542672 |
| 55 | 1 | H | -2.66475   | -3.370124 | -9.500429 |
| 56 | 1 | H | -6.255749  | -0.386526 | -10.17219 |
| 57 | 1 | H | -7.349934  | 2.756471  | -6.87793  |
| 58 | 1 | H | -10.436724 | -3.166042 | -8.318838 |
| 59 | 1 | H | -12.37629  | -5.605141 | -7.032056 |
| 60 | 1 | H | -13.799306 | -2.918984 | -8.505901 |
| 61 | 1 | H | -6.473172  | -5.417687 | 0.469199  |
| 62 | 1 | H | -7.145454  | -4.984544 | 3.743631  |
| 63 | 1 | H | -8.107266  | -7.811788 | 2.167464  |
| 64 | 1 | H | -12.88848  | -7.041143 | 3.417131  |
| 65 | 1 | H | -11.562675 | -4.527448 | 5.233176  |
| 66 | 1 | H | -14.060771 | -3.875557 | 3.103759  |
| 67 | 1 | H | -9.844169  | -0.217027 | 10.986576 |
| 68 | 1 | H | -10.415394 | -2.994862 | 9.227682  |
| 69 | 1 | H | -8.431579  | -0.585738 | 7.959816  |

## Anti-Inflammatory Effect Assay

**Cell Culture.** RAW264.7 macrophages were obtained from American Type Cell Collection (ATCC, America), cultured in DMEM with 10% heat-inactivated FBS and maintained in a humidified incubator with 5% CO<sub>2</sub> at 37 °C. THP-1 cells were obtained from ATCC and maintained in RPMI-1640 medium with 10% heat-inactivated FBS. In order to differentiate into macrophages, THP-1 cells were stimulated by phorbol 12-myristate 13-acetate (PMA, 100 ng/mL, Sigma Aldrich) for 10 h.

**Cell Viability Assay.** The compounds were dissolved in dimethyl sulfoxide (DMSO) at a concentration of 40 mM as the stock solution and stored at -20 °C. Cell Counting Kit-8 (CCK-8, Beyotime), LPS, dexamethasone (Dex), nigericin, the Griess reagent and DMSO were purchased from Sigma-Aldrich (America). Briefly, RAW264.7 cells (10000 cells/well) were seeded into a 96-well plate and incubated overnight at 37 °C. The tested compounds were added to the cells. Dimethyl sulfoxide (DMSO) was used as the vehicle control. Following incubation for 24h, 10 µL of the Cell Counting Kit-8 agent was added to cells and then incubated for 1.5 h at 37 °C. Finally, the absorbance at 450 nm was recorded using a microplate reader (Thermo Fisher, Waltham, MA, USA).

**ELISA:** Detection of NO and IL-1β cytokines by means of ELISA. RAW264.7 cells were seeded into 96-well plates (4 × 10<sup>4</sup> cells per well) and incubated to adhere for 24 h. The cells were then treated with different concentrations of compounds or vehicles (DMSO), followed by stimulation with 1 µg/mL LPS. Dex was used as the positive control. After 18 h, the supernatant was collected to detect the NO content using the Griess reagent. THP-1 cells culture medium was collected and centrifuged at 15,000 × g for 10 min at 4 °C. Supernatant (700 µL) were transferred to a new 2 ml tube, and mixed thoroughly with 700 µL methanol and 175 µL chloroform, after sit at room temperature for 10 min, the mixture was centrifuged at the same condition, and the white intermediate layer was collected. After washed with methanol, the protein sample in culture medium was dissolved in 2% SDS sample buffer for Western blotting analysis. The rest of supernatant was collected in another new tube and stored in -20 °C for ELISA kit detection. The level of IL-1β in cell culture medium was determined by ELISA kit (Neobioscience, China), according to the manufacturer's instruction.

**Western Blotting.** Western blotting was performed as described previously. For samples' preparation, THP-1 cells were fully lysed with RIPA buffer. Then, the protein concentration was determined using a BCA Protein Assay Kit and all samples were diluted into the same concentration. Equal number of proteins (20–30 µg) were separated by sodium dodecyl sulfate-polyacrylamide gel electrophoresis (SDS-PAGE), transferred to polyvinylidene fluoride (PVDF) membranes, and then blocked with 5% nonfat milk in TBST buffer (100 mM NaCl, 10 mM Tris-HCl, pH 7.5 and 0.1% Tween-20) for 2 h at room temperature and incubated with relevant primary antibodies overnight at 4 °C. After washing with TBST three times, a horseradish peroxidase-conjugated secondary antibody was added and incubated for 2 h at room temperature. Signals were developed using a SuperSignal West Femto Maximum Sensitivity Substrate kit (Thermo, America). Finally, specific protein bands were visualized using the ChemiDoc MP Imaging System (Bio-Rad, Hercules, America) and quantitated using Image Lab 5.1.

**Figure S1.** The raw images for all Western blot.

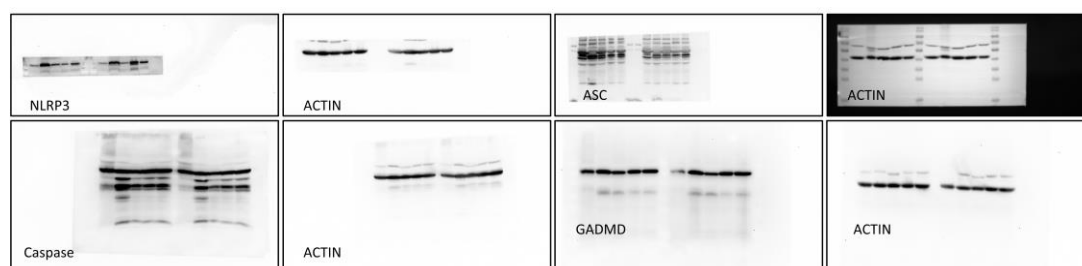

**Figure S2.**  $^1\text{H}$  NMR spectrum of compound **1** (recorded in methanol- $d_4$ )

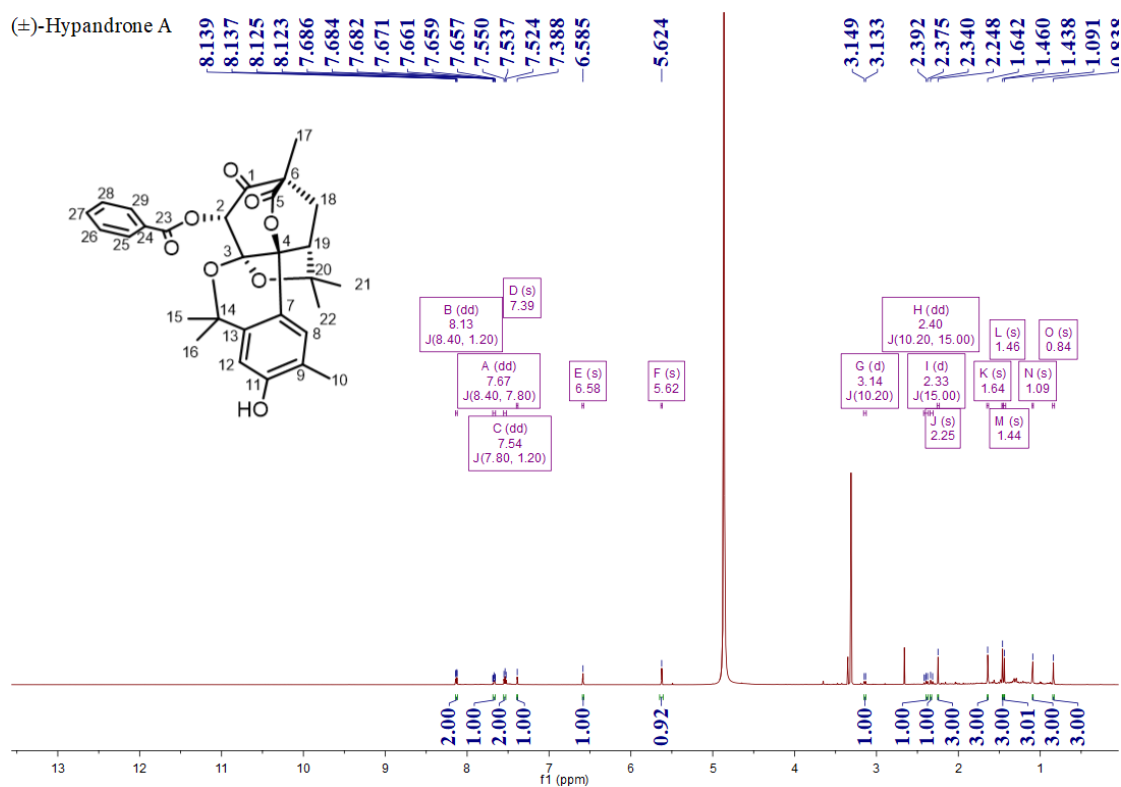

**Figure S3.**  $^{13}\text{C}$  NMR spectrum of compound **1** (recorded in methanol- $d_4$ )

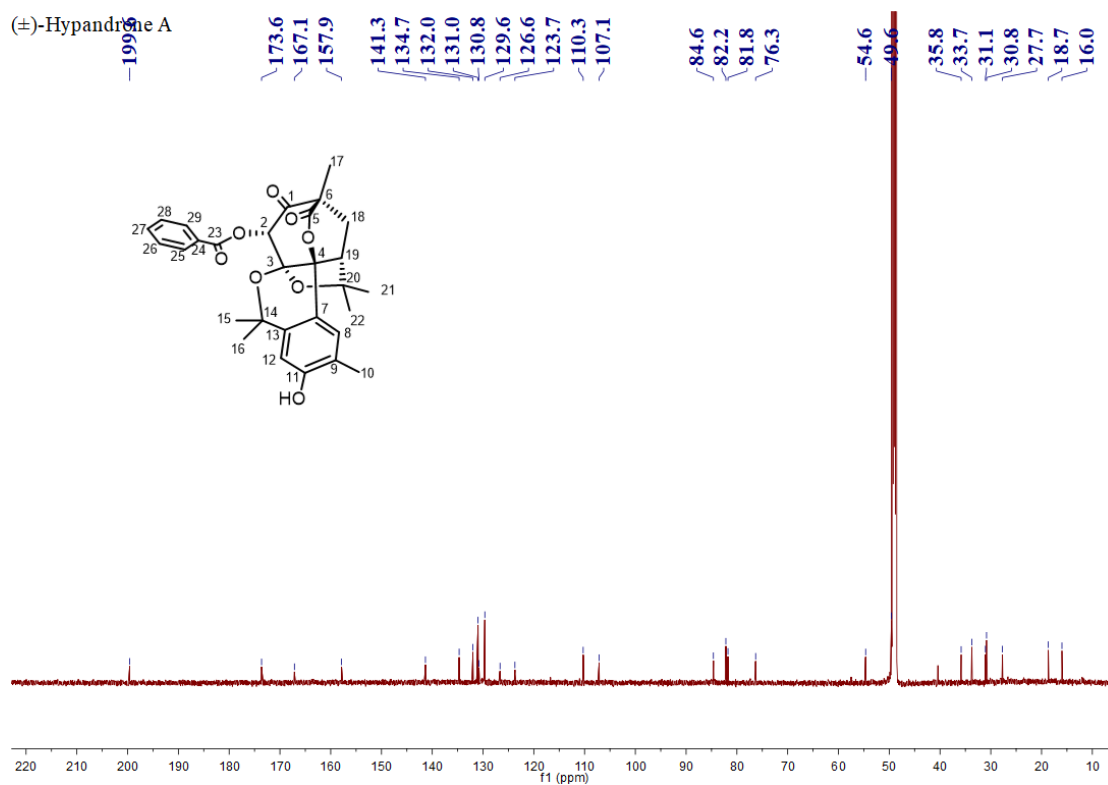

**Figure S4.** DEPT spectrum of compound **1** (recorded in methanol- $d_4$ )

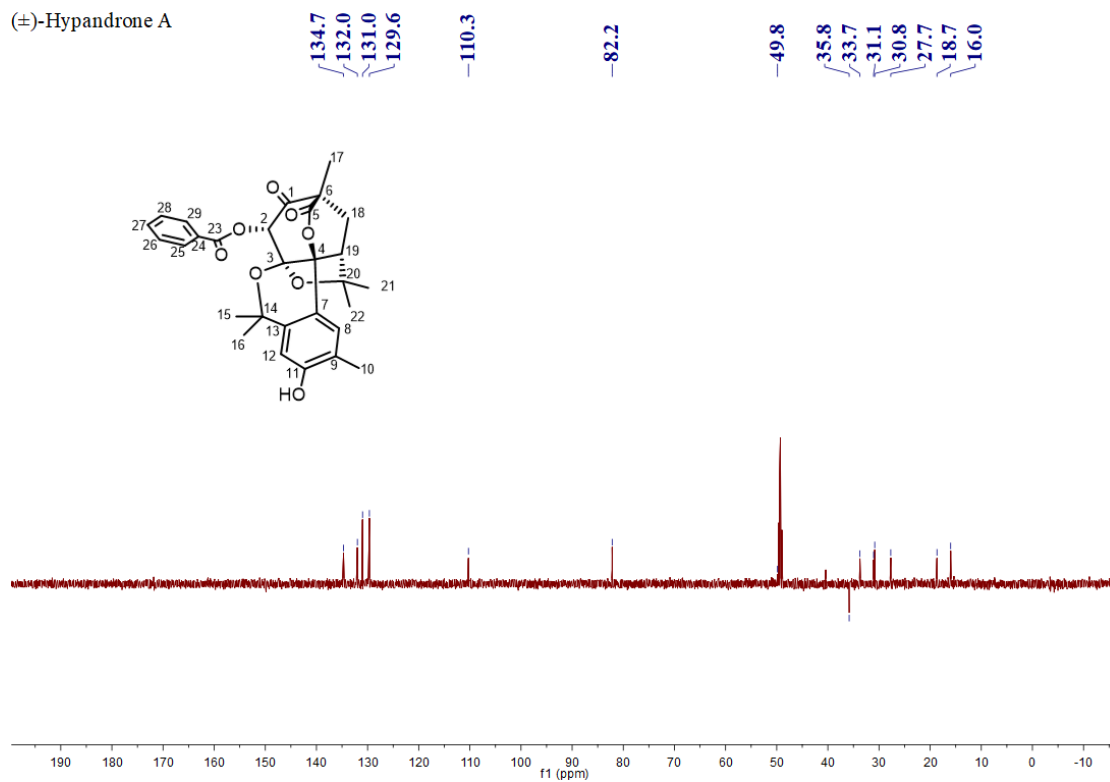

**Figure S5.** HSQC spectrum of compound **1** (recorded in methanol- $d_4$ )

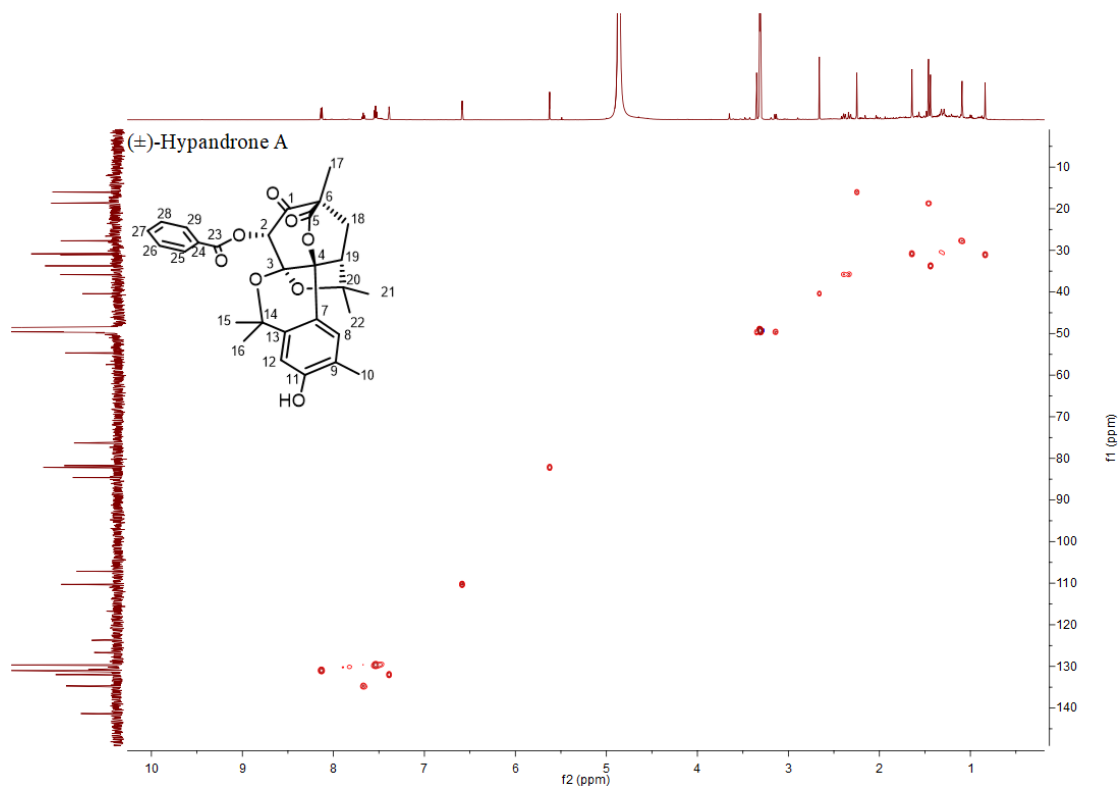

**Figure S6.** HMBC spectrum of compound **1** (recorded in methanol- $d_4$ )

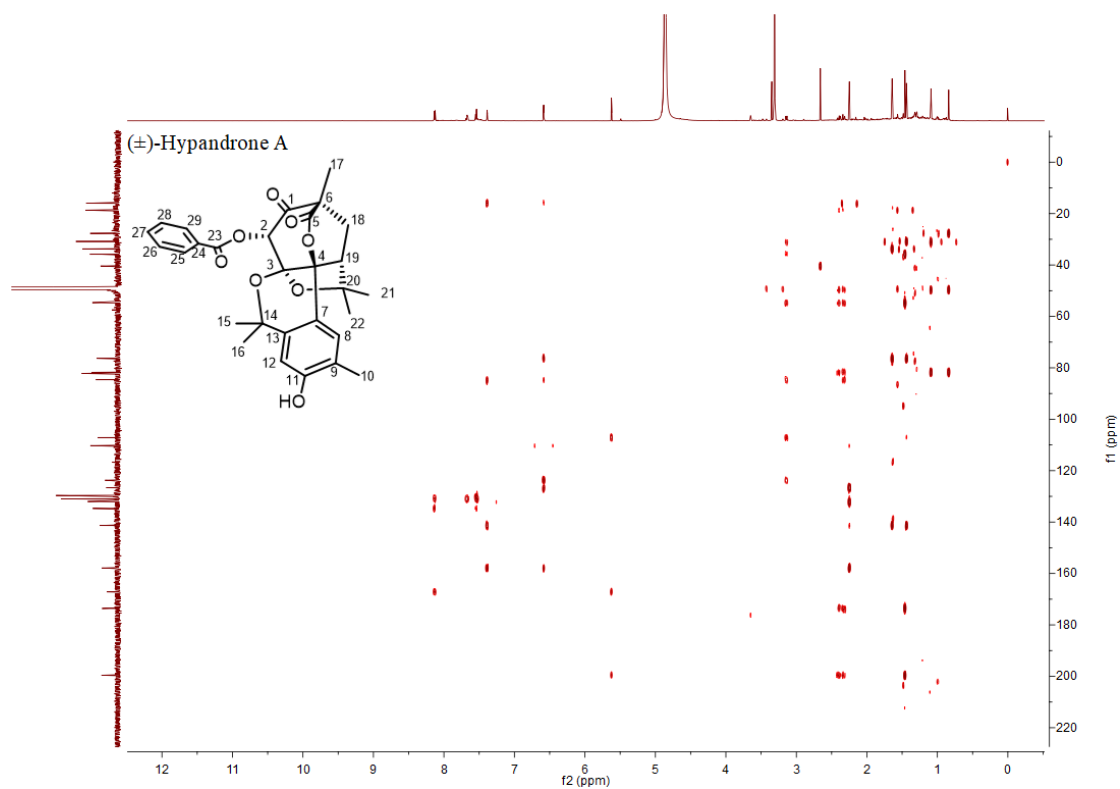

**Figure S7.**  $^1\text{H}$ - $^1\text{H}$  COSY spectrum of compound **1** (recorded in methanol- $d_4$ )

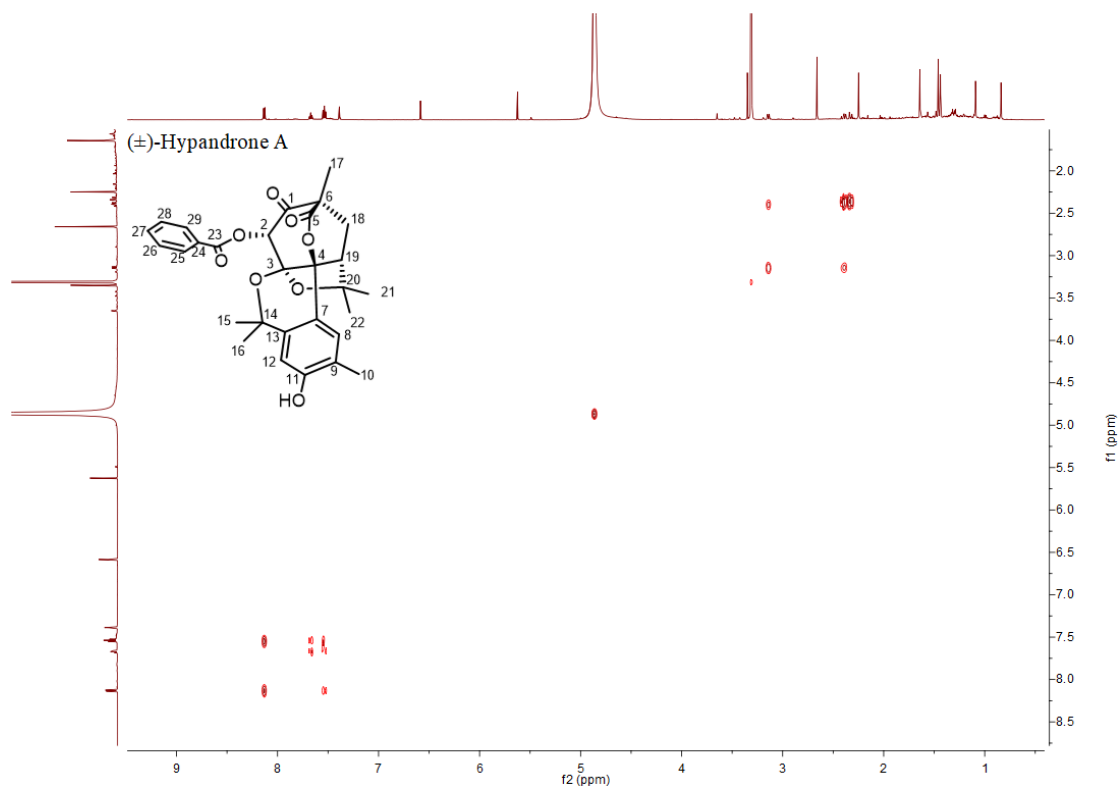



**Figure S8.** NOESY spectrum of compound 1 (recorded in methanol- $d_4$ )

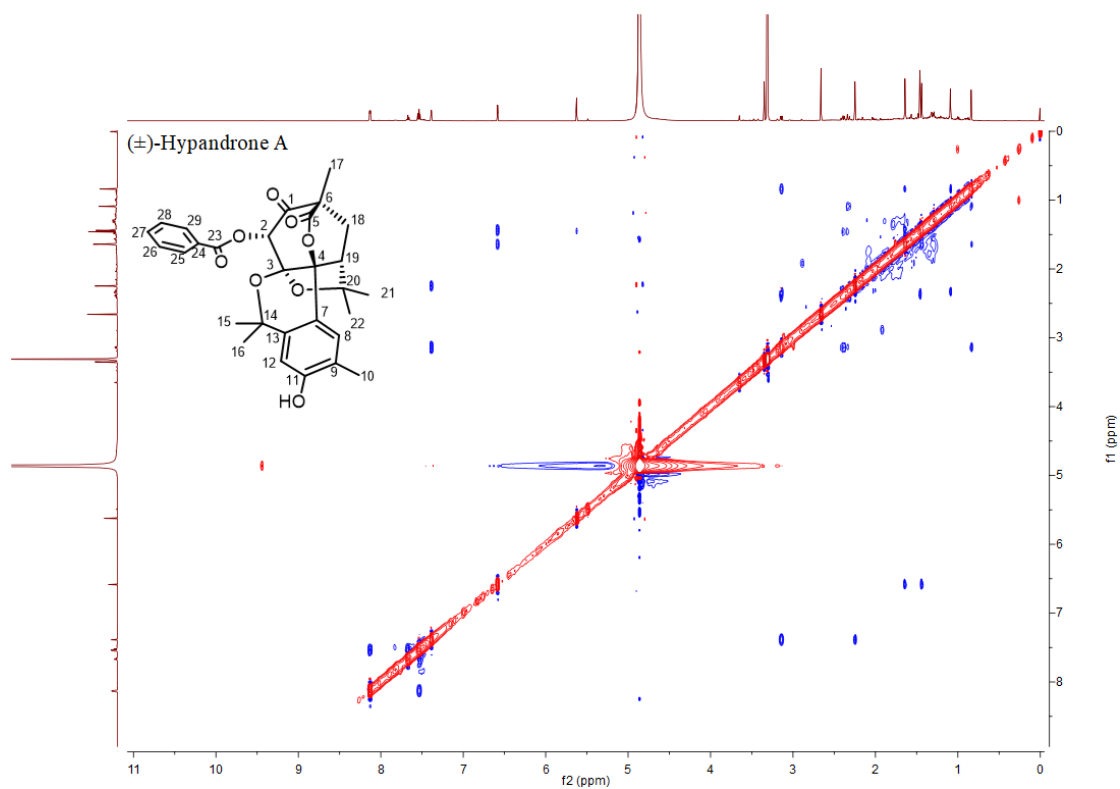

**Figure S9.** HRESIMS spectrum of compound ( $\pm$ )-1

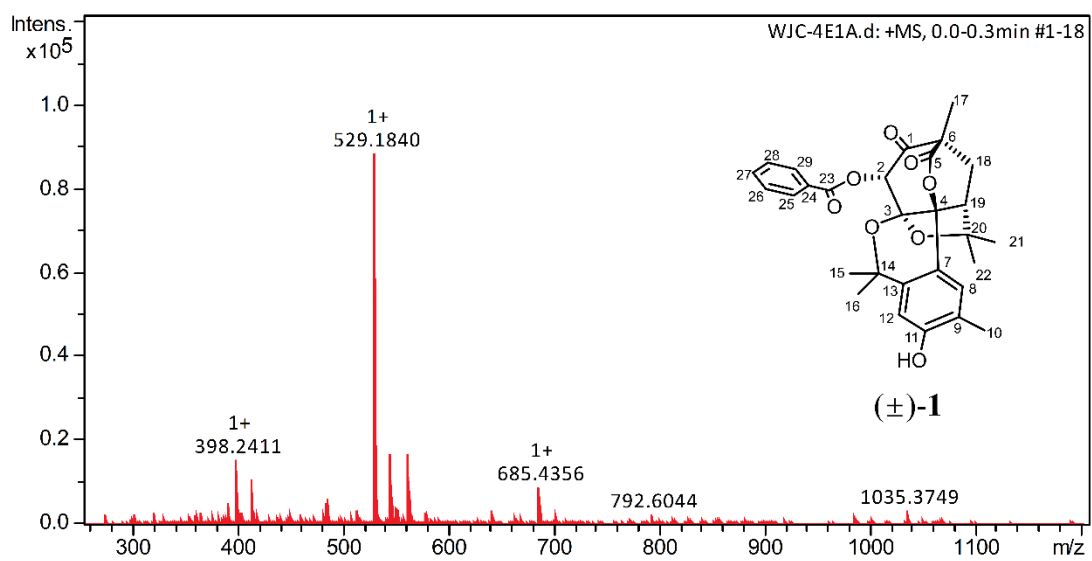

Figure S10. IR spectrum of compound ( $\pm$ )-1

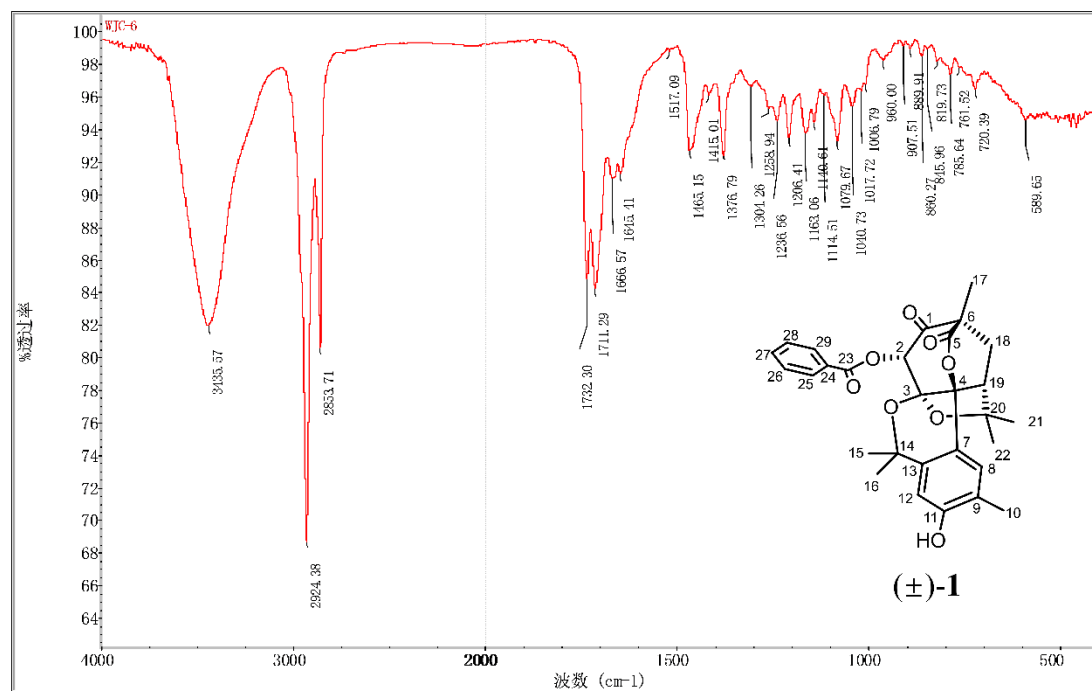

Figure S11. UV spectrum of compound ( $\pm$ )-1

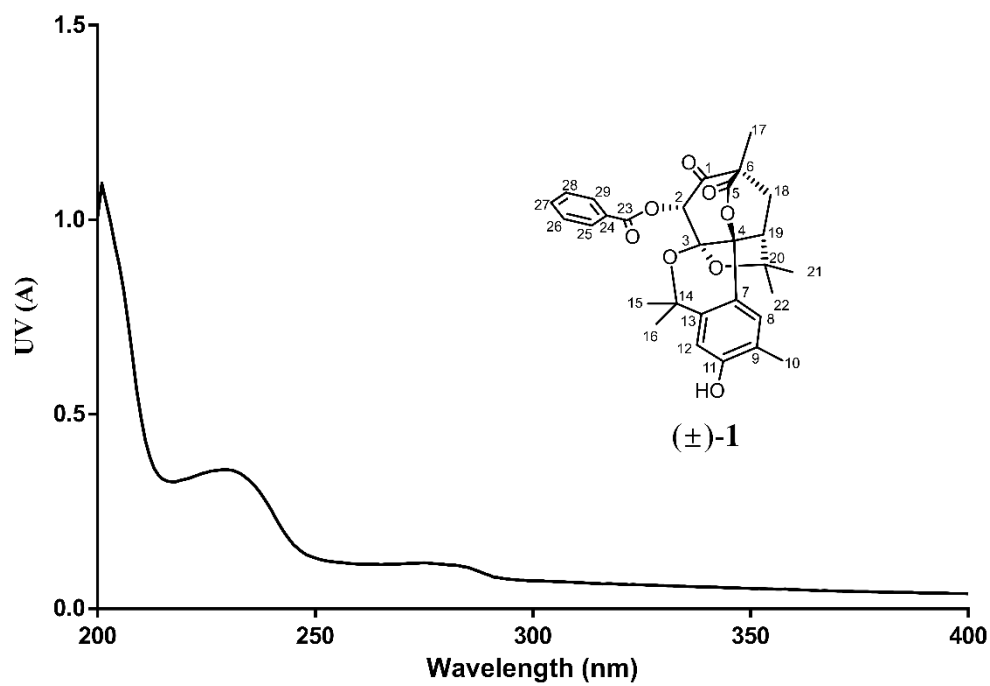

**Figure S12.** Chiral HPLC separation chromatogram of ( $\pm$ )-1

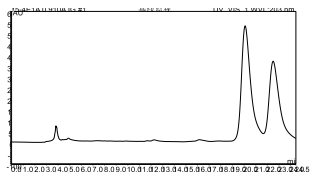

**Figure S13.** CD spectrum of ( $\pm$ )-1 in MeOH

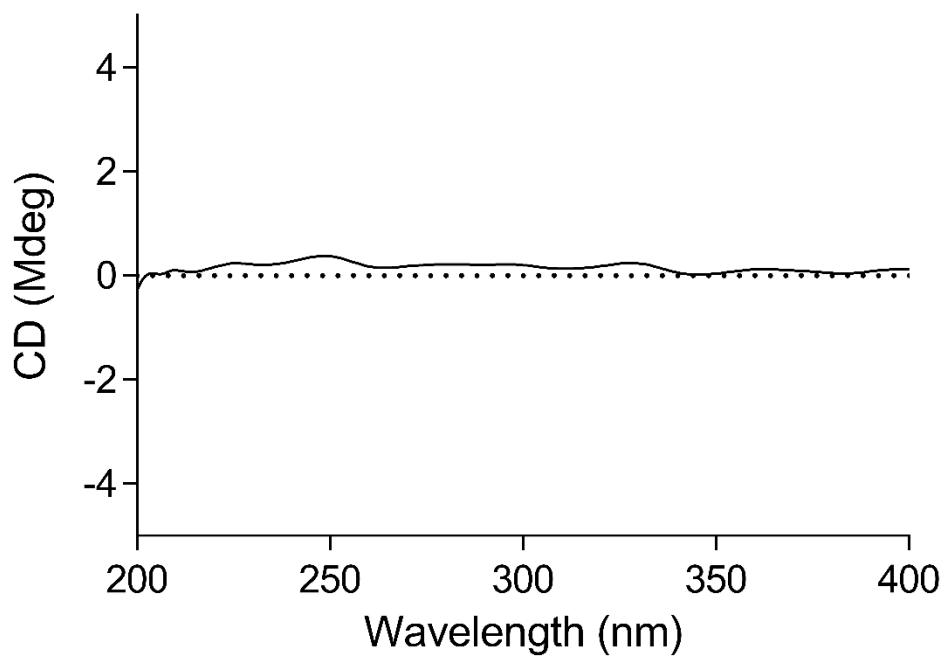

**Figure S14.** CD spectrum of (+)-**1** in MeOH

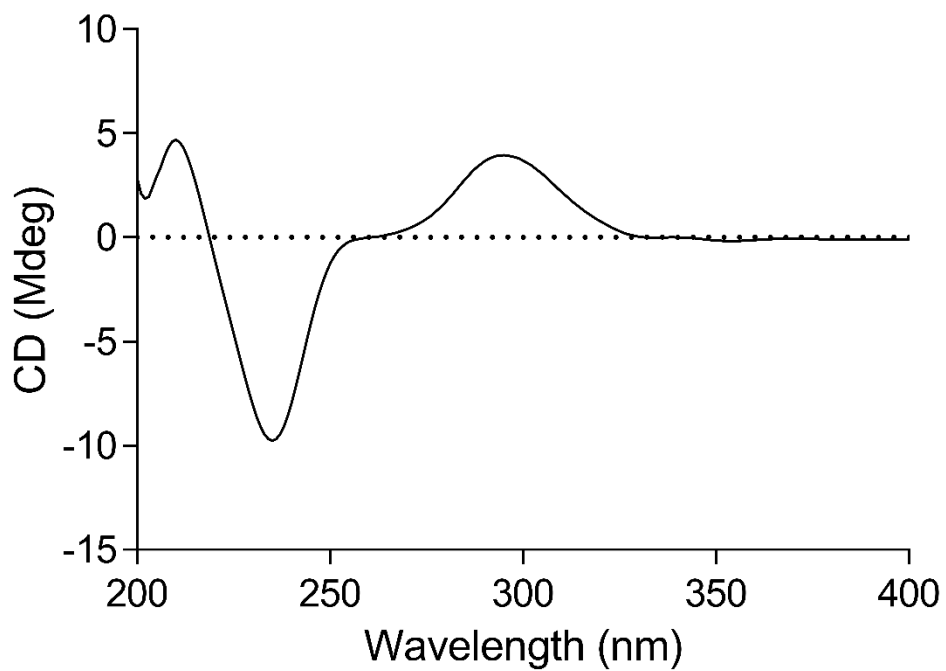

**Figure S15.** CD spectrum of (-)-**1** in MeOH

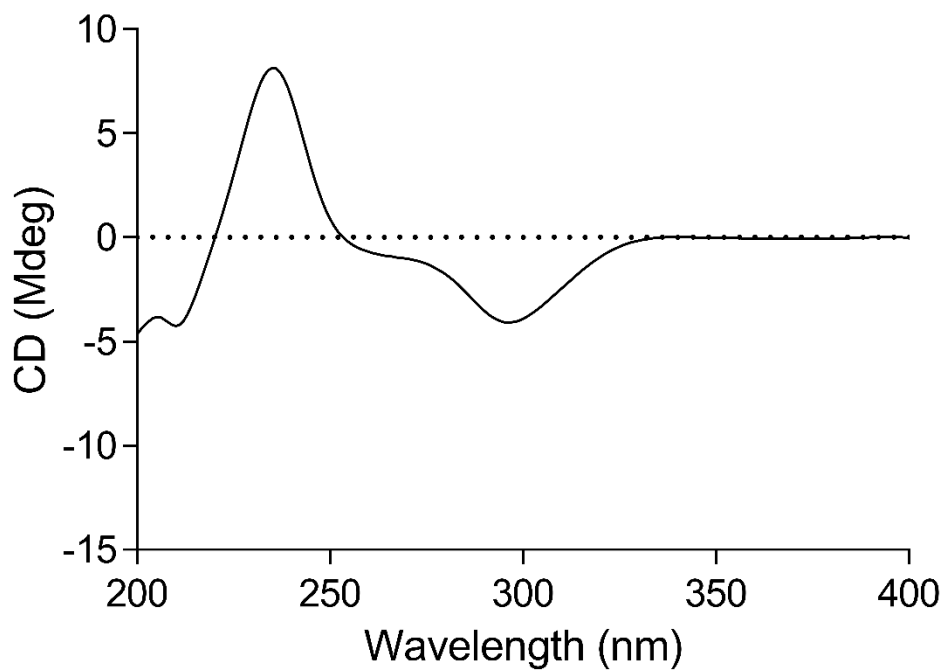

Supplement: d4qo00444b1.pdf [file d4qo00444b1.pdf]
